# Supplementary material for: Primary Hereditary Haemochromatosis and Pregnancy
Source: Hindawi journal article supplement (doi:10.1155/2023/2674203), 2023-01-31
Supplement: f1 [file 2674203.f1.zip]

Archive with 4 entries (4 files):
- Characteristics of the case reports .docx
- Characteristics of the reviews (1).docx
- Charactersitics of the Observational studies (1).docx
- Prisma Check List.docx
