# Supplementary material for: Primary Hereditary Haemochromatosis and Pregnancy
Source: Hindawi journal article supplement (doi:10.1155/2023/2674203), 2023-01-31
Supplement: f1 [file 2674203.f1.zip › Characteristics of the case reports .docx]

**Characteristics of the case reports included in the article:**

| No | **Author, Year, Country** | **Study Type & Name** | **Participants, sample size** | **Limitations** | **Strengths** | **Outcome** |
| --- | --- | --- | --- | --- | --- | --- |
| 9 | R Krysiak 2010, Poland | Case Report (Recurrent pregnancy induced diabetes insipidus in a women with hemochromatosis) | 1 patient (35 year old pregnant patient) | Case report  1 case | One of the very few case reports indicating serious complications in pregnancy in hemochromatosis | Patient was treated with Decompression in pregnancy. She was treated for hemochromatosis after delivery with chelation |
| 10 | A L Hoefnagel 2011 USA | Case Report (Anaesthetic management of vaginal delivery in a parturient with hemochromatosis induced end organ failure) | Case report (Pregnant patient at 32 weeks of pregnancy) | Case report  1 case | Serious cardiovascular complications in a pregnancy in HH diagnosed patient who was treated. | Patient was managed successfully in ICU and had normal vaginal delivery. |
| 11 | E Durand 2003 | Case report (Cardiogenic shock in a young women revealing juvenile hemochromatosis) | Case report of a 26 year old woman | Case Report  1 Case | Shows serious cardiovascular complications in pregnancy due to HH. HH was confirmed on iron studies but HFE HH screen was negative for C282Y & H63D. Diagnosis of juvenile HH was made based on early presentation and severity of the disease. | Patient required management in the cardiac ICU and recovered fully. |
