# Supplementary material for: Primary Hereditary Haemochromatosis and Pregnancy
Source: Hindawi journal article supplement (doi:10.1155/2023/2674203), 2023-01-31
Supplement: f1 [file 2674203.f1.zip › Characteristics of the reviews (1).docx]

**Characteristics of the reviews in the study:**

| **No** | **Authors, year, country** | **Type of study and name** | **Participants & sample size** | **Limitations** | **Strengths** | **Outcome** |
| --- | --- | --- | --- | --- | --- | --- |
| 2 | J Alexander 2009, USA | Collaborative review, (HFE associated hereditary hemochromatosis) | Total 60 studies included | Pregnancy not included | Every aspect of HFE HH was discussed | ---- |
| 3 | A Siddique 2012, USA | Review (Review article: iron overload syndromes) | Total 187 articles | Data up to 2012, Pregnancy not included | Discussed all iron over load syndromes. Differential diagnosis of | ---- |
| 4 | J O’Neil 2005, USA | Review (Clinical aspects of hemochromatosis) | Total 96 articles included | Studies up to 2005, Pregnancy not discussed | Articles from 1935 included. | ---- |
| 5 | B Bacon 2010, Switzerland | Clinical practice guideline (EASL, Clinical practice guideline for HFE hemochromatosis) | 234 articles included | Some information on pregnancy but does not cover effects of hemochromatosis on pregnancy & vice versa. New treatments not mentioned. | All other aspects are covered in details. | ---- |
| 6 | K Allen 2010, Australia | Review Article (Hereditary hemochromatosis, diagnosis and management) | 16 articles | No mention of pregnancy | Covered practical aspects for use in pregnancy | ---- |
| 17 | M A V Bokhoven 2011, Neitherland | Clinical review (Diagnosis and management of hereditary hemochromatosis) | 39 articles | Pregnancy not part of review. | Talked about on-going search on Hepcidin agonists. | ---- |
| 8 | Jing Liu 2016, China | Systematic review & Meta-analysis ( Hepcidin: A promising therapeutic target for iron disorders, a systematic review) | 129 studies included | Animal studies | Studies targeting mechanism of action of medications on the iron metabolism in hemochromatosis | ---- |
| 13 | DA Kennedy 2012, Canada | Review (Lead exposure, gestational hypertension and pre-eclampsia, a systematic review of cause and effect) | 9 papers | Blood samples were not taken at one gestational age in all studies. | Medline, Embase and Web of science searched from inception to 2011 August  6 of 9 studies confirmed hypothesis, all human studies, no language restriction. | Positive association between maternal blood lead concentration and the development of Gestational hypertension and pre-eclampsia was found in 6 out of 9 studies |
| 15 | M J Brown 2013, USA | Review (Role of chelation during pregnancy in the lead poisoned patient) | 6 articles | Small number of studies | CDC guidelines included explaining maternal blood lead level follow up during pregnancy | Chelation Therapy to pregnant women should be given at blood lead level of 45 ug/dl or more |
| 18 | C G Undacker 2012 Austria | Review (Role of placenta in foetal exposure to heavy metals) | 72 articles | ---- | Lead bioavailability studies well. | Prenatal exposure to lead is associated with reduced birth weight, birth length and head circumference. Lead has pro-oxidative effect and inhibits anti-oxidant process depleting thiol- containing anti-oxidants. Lead causes neurodevelopmental disorders and brain dysfunction. Lead is mainly stored in syncytiotrophoblast cells |
