# Supplementary material for: Primary Hereditary Haemochromatosis and Pregnancy
Source: Hindawi journal article supplement (doi:10.1155/2023/2674203), 2023-01-31
Supplement: f1 [file 2674203.f1.zip › Charactersitics of the Observational studies (1).docx]

**Characteristics of the Observational studies in the review:**

| **No** | **Author, year, country** | **Type of study, Name** | **Participants & Sample size** | **Limitations** | **Strengths** | **Outcome** |
| --- | --- | --- | --- | --- | --- | --- |
| 1 | M B Lanktree 2015, Canada | Retrospective Cohort (Examining the clinical use of Hemochromatosis genetic testing | 664 Patients referred for HFE testing, Biochemical iron studies and history of phlebotomy was noted | Retrospective study. Clinical, biochemical, phlebotomy data was available for 160 patients only | Big Sample  Genetic tests results available for all patients | Only 18% had HFE mutations positive. Patients at risk of HFE genotype had significantly higher iron saturation, serum iron and Hb. Test positive patients are4 times at higher risk of having phlebotomy. |
| 12 | You-Lin Tain 2016 Taiwan | Observational study. Incidence and risks of congenital anomalies of kidney and urinary tract in new-born | 668 infants with CAKUT (congenital anomaly of kidney and urinary tract).  Associated maternal risk factors were seen. | Retrospective. Registry data-base limitations. Data reported up to 7 days after birth so CAKUT may be underestimated. Potential for incomplete or inaccurate maternal health information. | Birth record registry includes comprehensive maternal health information. | Association between maternal thalassemia/hemochromatosis and CAKUT (OR 2.67, CI 1.35-5.27), P value <0.01 |
| 14 | Noura Al Jameil 2014, Saudi Arabia | Case controlled Cohort Study ( Maternal serum lead levels and risk of pre-Eclampsia in pregnant women: a cohort study in a maternal hospital, Riyadh, Saudi Arabia) | 120 pregnant women  40= low risk  40=high risk  40= pre-eclamptic  Blood lead levels were checked at admission | Exposure to potential sources of lead was not ascertained, such as canned food, drinks. | Case controlled study | In Riyadh Serum levels of lead were significantly high in pregnant women with pre-eclampsia |
| 16 | MP Karwowski 2014 USA | A Birth cohort study.  (Maternal iron metabolism gene variants modify umbilical cord blood lead levels by gene environment interaction: a birth cohort study) | 476 Mother-infant pairs. Maternal blood and umbilical cord blood lead levels were checked within 12 hours of delivery. Maternal & foetal HH genetic status was checked and the association between the two was ascertained. | Lead toxicokinetics are influenced by many genes including those in calcium regulation but in this study only iron specific genes were investigated. | Genetic frequencies for all 476 mother-infant pair were tested. Confounders were taken care. Blood lead was checked for all the 476 mother-infant pairs. | Mothers with HFE C282Y gene variants had lower umbilical cord blood lead levels relative to those born to women who were wild type. Lead related decrease in birth weight, advancement of cognitive decline, widening of pulse pressure and prolongation of QT interval was amplified in HFE gene variant carriers. The association between UCBL and MBL was not modified by infant gene variant status. |
| 17 | Z Kayaalti 2015 Turkey | Prospective Cohort (Maternal hemochromatosis gene H63D single nucleotide polymorphism and lead levels of placental tissue, maternal and umbilical cord blood) | 93 mother infant pairs. Mothers were screened for HH genetic mutation at > 36 weeks gestational age. Placental, maternal & cord blood lead was checked at delivery. | No case control. | Cord blood lead levels were checked in placenta, mother and cord blood. The association between maternal BL, PLB and FCBL was not modified by maternal blood iron level, GA, BM or socioeconomic status | In Turkish mothers with H63D gene variants had higher lead levels in the umbilical cord of new-born, indicating baby could be at risk of in-utero exposure to lead. |
| 19 | D Cantonwine 2010, USA | Prospective birth cohort study.  (HFE gene variants modify the association between maternal lead burden and infant birth weight. A prospective birth cohort study in Mexico city, Mexico. | 533 mothers/390 infants. Association of lead and infant birth weight in a cohort of mother infant pair was investigated for HFE C282Y, H63D and TFPS70S gene variants | No direct measure of maternal iron in pregnancy instead haemoglobin (Hb) was measured 1 month postpartum. Hb cannot detect iron deficiency without anaemia. Other markers of iron status during pregnancy were not measured. Only 6 infants had heterogeneous C282Y so study is underpowered to test it. | Adjustments were done for maternal age, education, infant gender, maternal arm circumference, gestational age, smoking status, marital status, maternal Hb 1 month post-partum & parity. | Both maternal HFE H63D and foetal genotype may modify tibia lead level effect on birth weight of infant in an opposing way |
| 20 | CM Taylor 2014 UK | Prospective cohort (Adverse effects of maternal lead level on birth outcomes in the ALSPAC study: A prospective birth cohort study | 4285 mother-children pair. Association of prenatal blood lead level was checked with pregnancy outcome | Bias of older female population and higher educational background. | Bigger sample | There is evidence of adverse effect of maternal blood lead on the incidence of preterm delivery, birth weight, head circumference and crown rump length. |
| 21 | Yun-Chul Hong 2016 Korea | Prospective Cohort study. (postnatal growth following prenatal lead exposure and calcium intake) | 1150 pregnant women and infants | Racial factors may limit the generalization of the results to other populations (all participants were Korean). The exposure to other pollutants could have biased the results. | Large sample | Prenatal lead exposure in late pregnancy is significantly associated with reduction in infantile growth at 24 months. Dietary calcium intake at mean or upper level was protective but low calcium intake intensified the adverse effect at prenatal lead level <5 ug/dl. |
| 22 | Schannas 2006, Mexico | Prospective Cohort (Reduced Intellectual development in children with postnatal lead) | 175 children. Prenatal lead exposure association was tested for child’s intellectual development. | Sample drop from 321 to 174 at 5 year follow up | 150 children had complete data including all co-variates | Lead exposure around 28 weeks gestational age is a critical period for later child’s intellectual development. The IQ at 6 to 10 years significantly decreased only with increasing 3rd trimester lead. |
| 23 | X Wang 2014 Australia | Case controlled prospective cohort. (Heme bound iron activates placental growth factor in erythroid cells via erythroid kruppel like factor) | 30 C282Y Homozygous HH patients.  10 Controls  No. of SCD patients not mentioned. The association of increased iron burden causing increased PIGF leading to cardiovascular & pulmonary Hypertension was tested. | Small number of patients for HH.  No. Of patients for SCD was not mentioned. | Case control study.  Objective evidence of findings. | Erythroid cell load of hemin stimulates expression of EKLF, leading to increased expression of PIGF, which in turn causes vascular complications in patients with iron overload disorders. |
| 24 | H Gaenzer 2002 Austria | Case controlled prospective cohort. (Association between increased iron stores and impaired endothelial function in patients with Hereditary hemochromatosis.) | 41 C282Y homozygous patients. 51 age matched controls. Endothelium dependent dilatation (EDD) of the brachial artery and intima media thickness of the carotid artery (IMT) was measured to check the association between iron saturation and early functional and structural vascular abnormalities in HH patients were checked. | The number of untreated HH patients was small (16). Study was unable to recruit females with severe iron overload. Contribution of the environmental factors cannot be ruled out. The intervention portion of the previously untreated patients was not randomised. | Case controlled.  Effects of iron were reversed with treatment by phlebotomy. | Impaired endothelial function and increased IMT are associated with iron overload and not linked to genetic disability in HH patients. Iron depletion can normalise EDD and prevents further deterioration in IMT, hence risks of cardiovascular disease are decreased. |
| 26 | L C Chappell 2013 UK | Prospective multicentre cohort (Diagnostic accuracy of placental growth factor in women with suspected pre-eclampsia: A prospective multicentre study) | 625 women. | Maternal plasma PIGF normally decreases in later part of 3rd trimester reducing test performance at or more 35 weeks of gestational age. | To determine essay reproducibility, replicate samples were checked at a central lab. | Mothers presenting before 35 weeks of gestational age with suspected pre-eclampsia and PIGF <5th centile had sensitivity of 0.96 and negative predictive value of 0.98 for developing pre-eclampsia within next 14 days. |
| 27 | A Tsiakkas 2015 UK | Prospective cohort (Serum placental growth factor in the three trimesters of pregnancy: effects of maternal characteristics and medical history) | 382002 pregnant women in 1st Trimester. 10281 2nd Trimester.  12392 in 3rd T | None | Prospective. Large sample size, all 3 trimesters were included. Application of multiple regression analysis to define the contribution and inter-relation of maternal variables that influence the measured PIGF across the 3 trimesters of pregnancy | Maternal serum PIGF at 11-13 weeks of GA is decreased in pregnancies affected with aneuploidies and those with impaired placentation causing pre-eclampsia and SGA (small for gestational age)  A model was fitted to express the measurement of serum PIGF across 2 trimesters of pregnancy as MOMs after adjusting variables of maternal characteristics and medical history that effects this measurement. |
| 25 | M T Dorak 2009 USA | Retrospective case controlled cohort ( Hereditary hemochromatosis gene (HFE) variants are associated with birth weight and leukaemia risk) | 1117 infant and mother pairs where both DNA & Plasma samples were available.  DNA samples from 163 incident childhood leukaemia cases, age <16 years were taken. | Retrospective. Insufficient power to assess some interactions. For childhood acute lymphocytic leukaemia cases, lack of birth weight data and maternal genotype and environmental exposure data like maternal iron level and mothers iron and folate intake during pregnancy was missing. | Ethnic homogeneity of the study population. Geographical matching of childhood ALL cases and infant contribution. A high level of genotyping quality. Consideration of more than one gene and multiple variants from the same pathway. Assessment of both foetal gender and maternal effect. | Infants with HFE variants showed correlation with increasing birth weight with a gene dosage relationship in males more than females. Association was stronger for homozygotes of TFRCS142G & when mother was HFE variant. The genotype expected to increase foetal iron levels correlated with birth weights in male infants and their association with ALL was stronger for female infants who could not offset iron excess by increasing their birth weight. |
| 28 | Sara Sammallahti 2022 | Prospective cohort study (Maternal early pregnancy ferritin and offspring neurodevelopment: A prospective cohort study from gestation to school age. | 2479 mother & child pairs. Data was in the form of maternal serum ferritin and cognitive tests on children | Gives indirect evidence. Rather smaller number of patients with high serum ferritin. | Prospective data. | High maternal ferritin was associated with 2.54 points lower child intelligent quotient and 16.2 cm3smaller brain volume. Maternal iron status during pregnancy may be associated with child’s neurodevelopmental delays. |
| 29 | Ketil Stordal 2018 | Prospective cohort study (Prenatal iron exposure and childhood type 1 diabetes) | 94209 pregnancies and children from these pregnancies. | Indirect evidence | Prospective study. Large sample. Sample included HFE HH patients as well | Incidence of type 1 diabetes was higher in children whose mothers had iron supplementation in the pregnancy. Adjusted hazards ratio was 1.33. Maternal HFE genotype with high and intermediate iron stores was also associated with offspring’s diabetes with odd ratio of 1.45 and confidence interval of 1.04 to 2.02 |
