# Supplementary material for: Primary Hereditary Haemochromatosis and Pregnancy
Source: Hindawi journal article supplement (doi:10.1155/2023/2674203), 2023-01-31
Supplement: f1 [file 2674203.f1.zip › Prisma Check List.docx]

| Prisma Check List | |
| --- | --- |
| Title | Primary Hereditary Hemochromatosis and pregnancy: Review  It is systematic review not meta-analysis |
| Abstract | Hemochromatosis increases the risks of fetomaternal complications like pre-eclampsia, cardiovascular disease, pulmonary hypertension, Diabetes mellitus and congenital anomalies, growth problems and childhood leukaemia. Hence previously women with hemochromatosis who were thought to be at no more risk of complications than general population, now need extra monitoring for both baby and mother. |
| Introduction | During literature search for the period of 21 years, no review articles were found about hemochromatosis and pregnancy, whereas there is evidence that hemochromatosis affects pregnancy due to not only genetic predisposition but also due to effects of iron metabolism on the absorption of other metals and biomarkers. |
| Methods | The initial search was from Ovid Medline® from 2002 to 2013. We used the limits of English language & Human and combined articles of hemochromatosis with pregnancy. Studies on neonatal hemochromatosis were not included. Second search was done using PUBMed central (2014-2016) with key words hemochromatosis, therapy, lead & pregnancy, and PIGF & iron. Limitation is it is retrospective, qualitative data. Third search in PUBMed central (2017-2022) was done using keywords haemochromatosis and pregnancy. |
| Results | We found 7 review articles, I collaborative review, 1 systematic review, 1 clinical practice guideline, 3 case reports and 16 observational studies. |
| Discussion | Primary hereditary hemochromatosis causes multi organ complications not only due to iron deposition but also by co-absorption of lead and activation of PIGF and Endothelin 1 pathway. Phlebotomy is the mainstay of treatment but agents like Hepcidin agonists to ameliorate the disease by acting on its pathophysiology are on their way. |
| Funding | No Funding involved in the process of this article. |
